# Supplementary material
Source: PubMed Central journal article supplement (PMC4325141)
Supplement: AEM.02896-14_zam999116046so1.pdf [file AEM.02896-14_zam999116046so1.pdf]

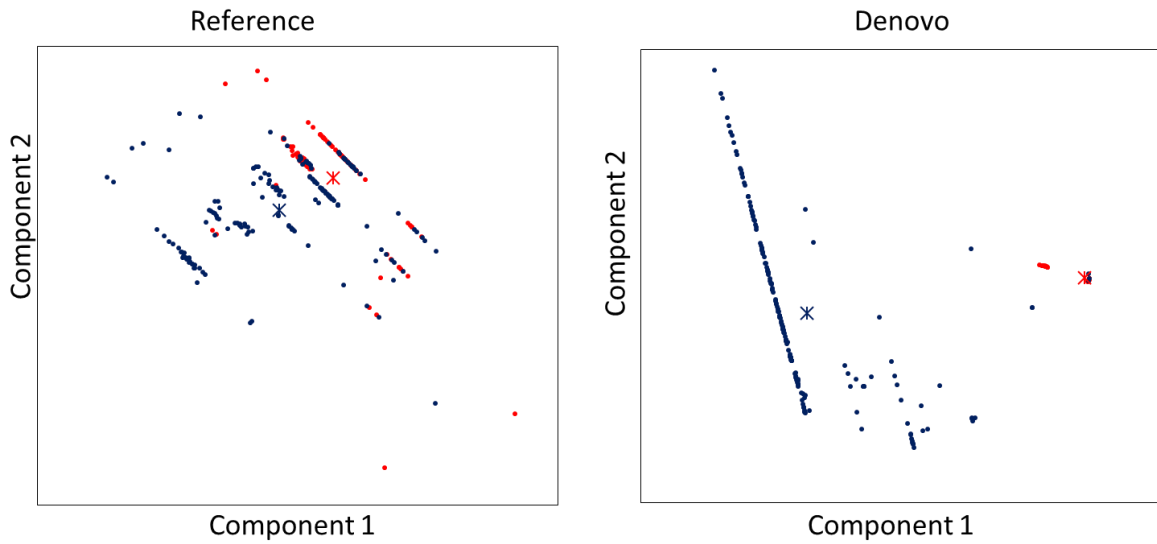

**Figure S1.** Plot illustrating the principle component analysis on the training data for both the reference and de novo application, where principal component 1 is in the X axis, and principal component 2 in the Y-axis. The red points represent the non-chimeric class and the blue points represent the chimeric class, respectively. The red asterisk represents the centroid of the non-chimeric class, and the blue asterisk represent the centroid of the chimeric class.

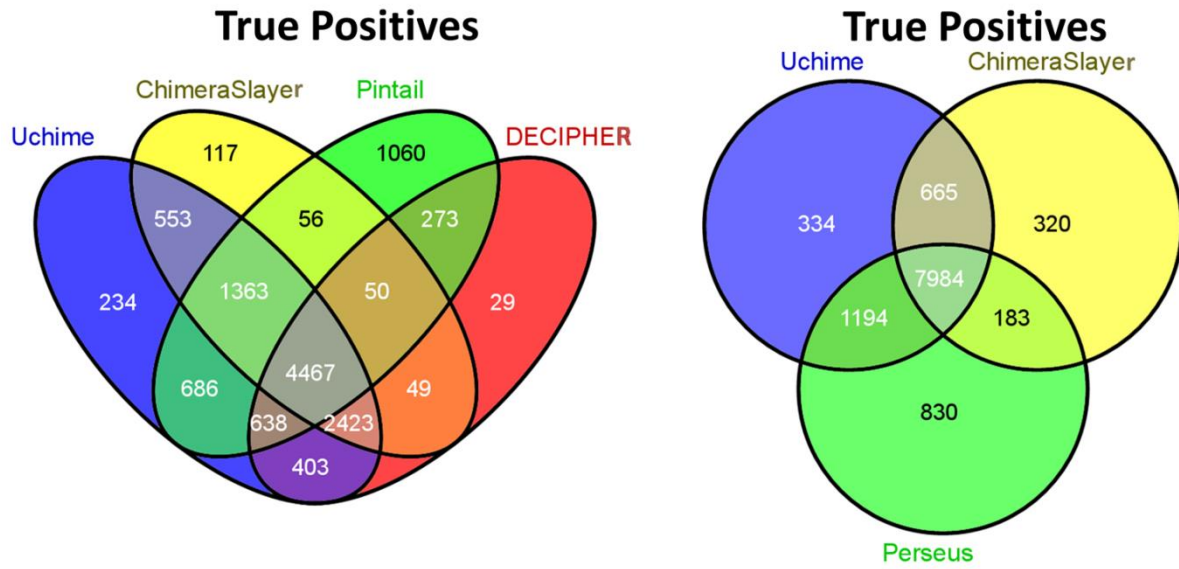

**FigureS2:** Venn diagrams showing the overlap between the chimeric sequences correctly predicted by individual chimera detection tools in the Mock2-a dataset. Left: reference based tools; right: de novo tools.

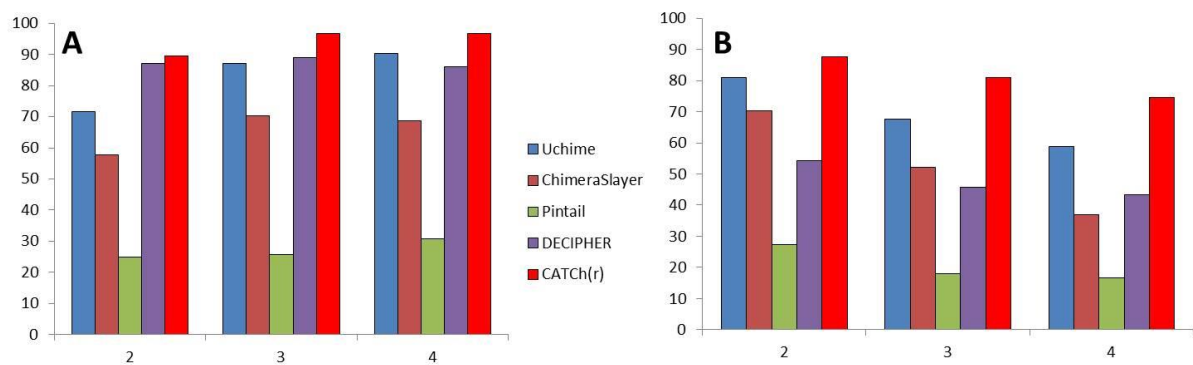

**Figure S3:** Sensitivity (in percentage) of all five reference-based algorithms (UCHIME, ChimeraSlayer, Pintail, DECIPHER and CATCH) for detection of different types of chimeras, i.e. having two (bimera), three (trimera) and four (tetramera) parents, applied on (A) Simu3 and (B) Simu2.

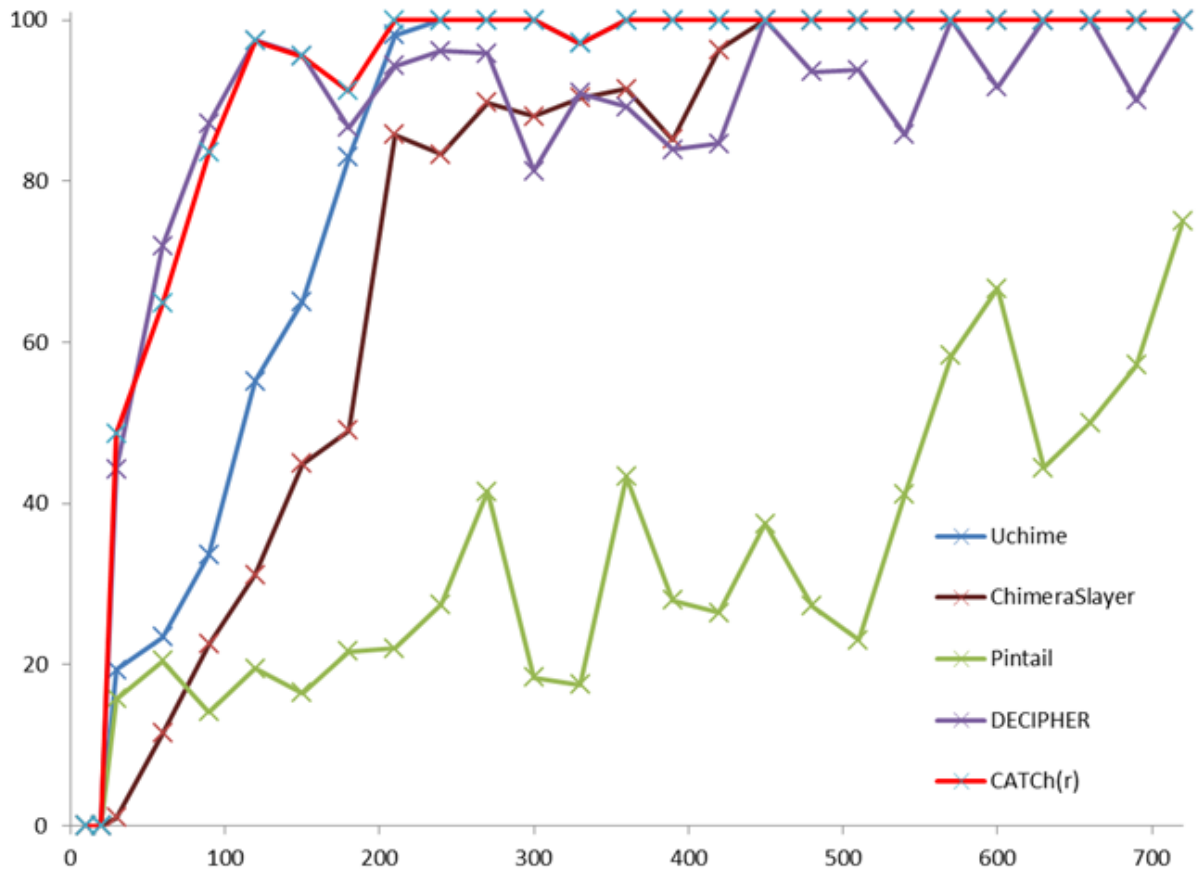

**Figure S4:** Effect of the chimeric range (X-axis) on the sensitivity of different algorithms (Y-axis) (UCHIME, ChimeraSlayer, Pintail, DECIPHER and CATCh), using Simu3 subset (b).

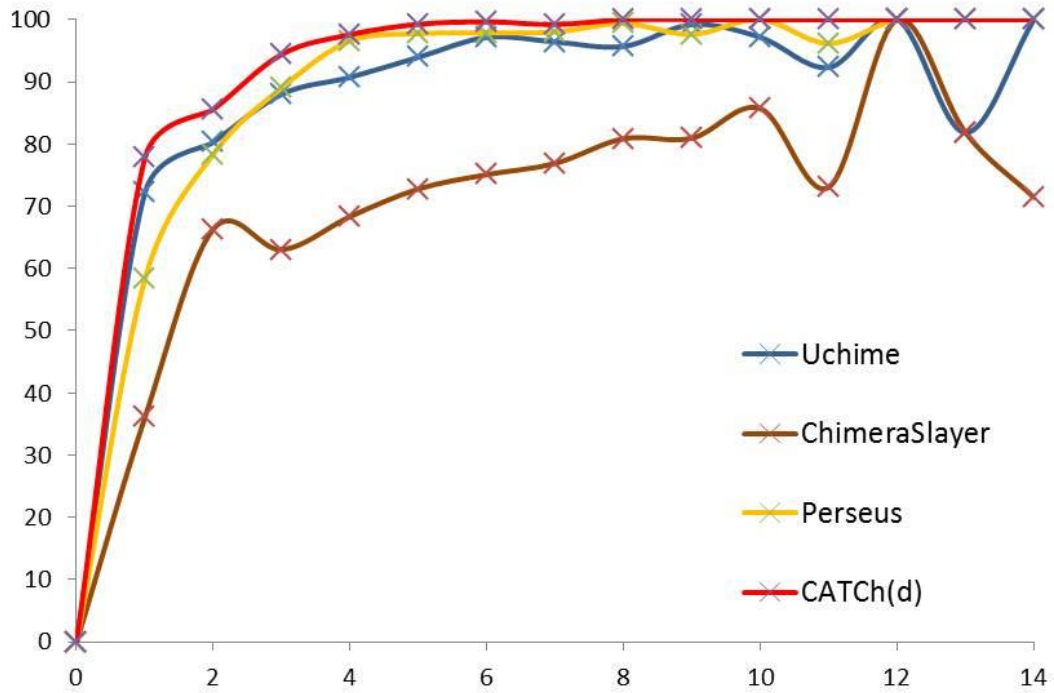

**Figure S5:** Illustration of the effect of the divergence of the chimeric sequences (X-axis) on sensitivity of the different de novo chimera detection tools (y-axis) using the Mock1 dataset with a divergence ranging from 1 to 14%. As shown, UCHIME de novo, ChimeraSlayer de novo, Perseus and CATCh de novo tend to detect chimeras with higher divergence more accurately than chimeras with lower divergence. As shown in the figure, CATCh produced the best performance compared to the other tools.

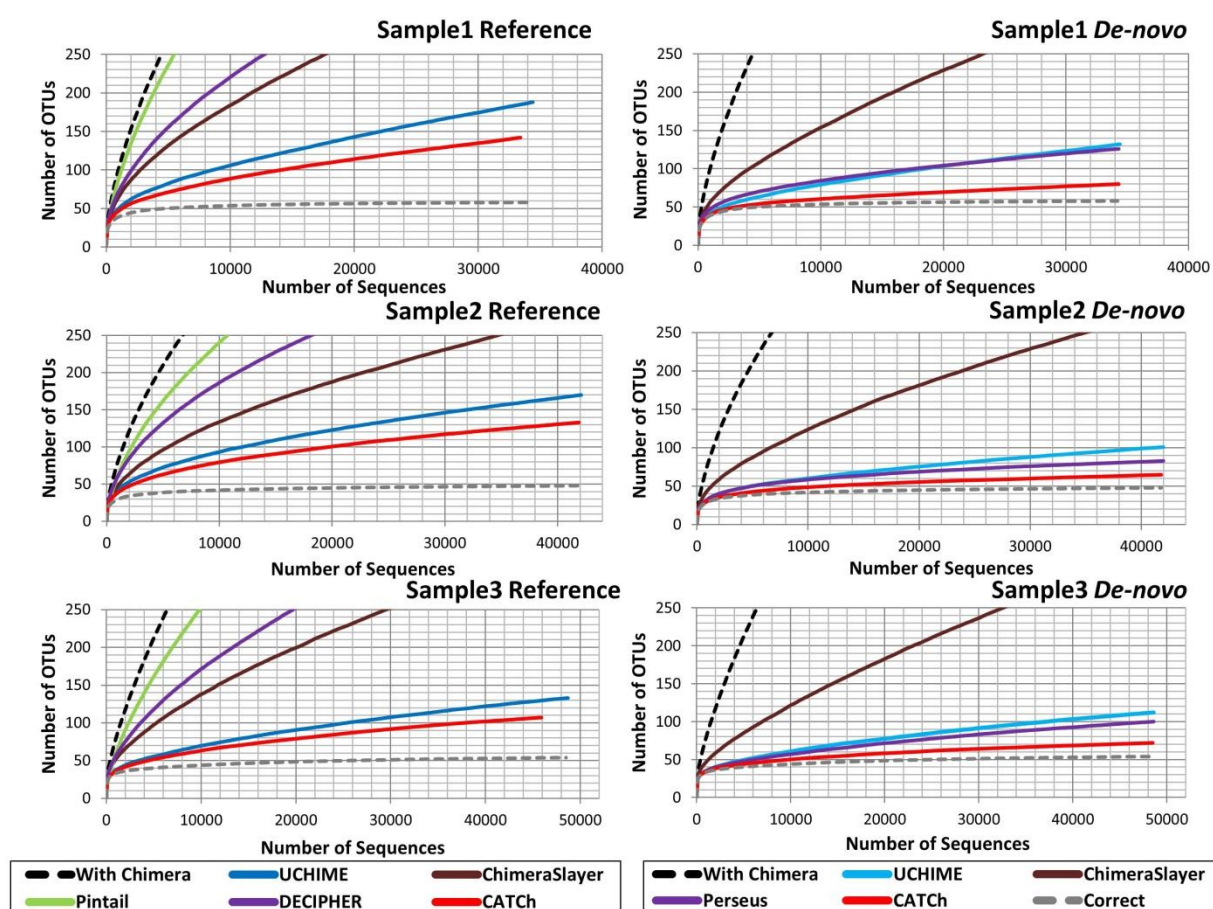

**Figure S6:** Rarefaction curves for Mock1 (sample 1,2 and 3) including the datasets i) without any chimera removal ('with chimera'), ii) removing all chimeric sequences ('correct'), and iii) with chimera removal using all tested chimera detection tools (reference-based approaches on the left side and de novo approaches on the right side).

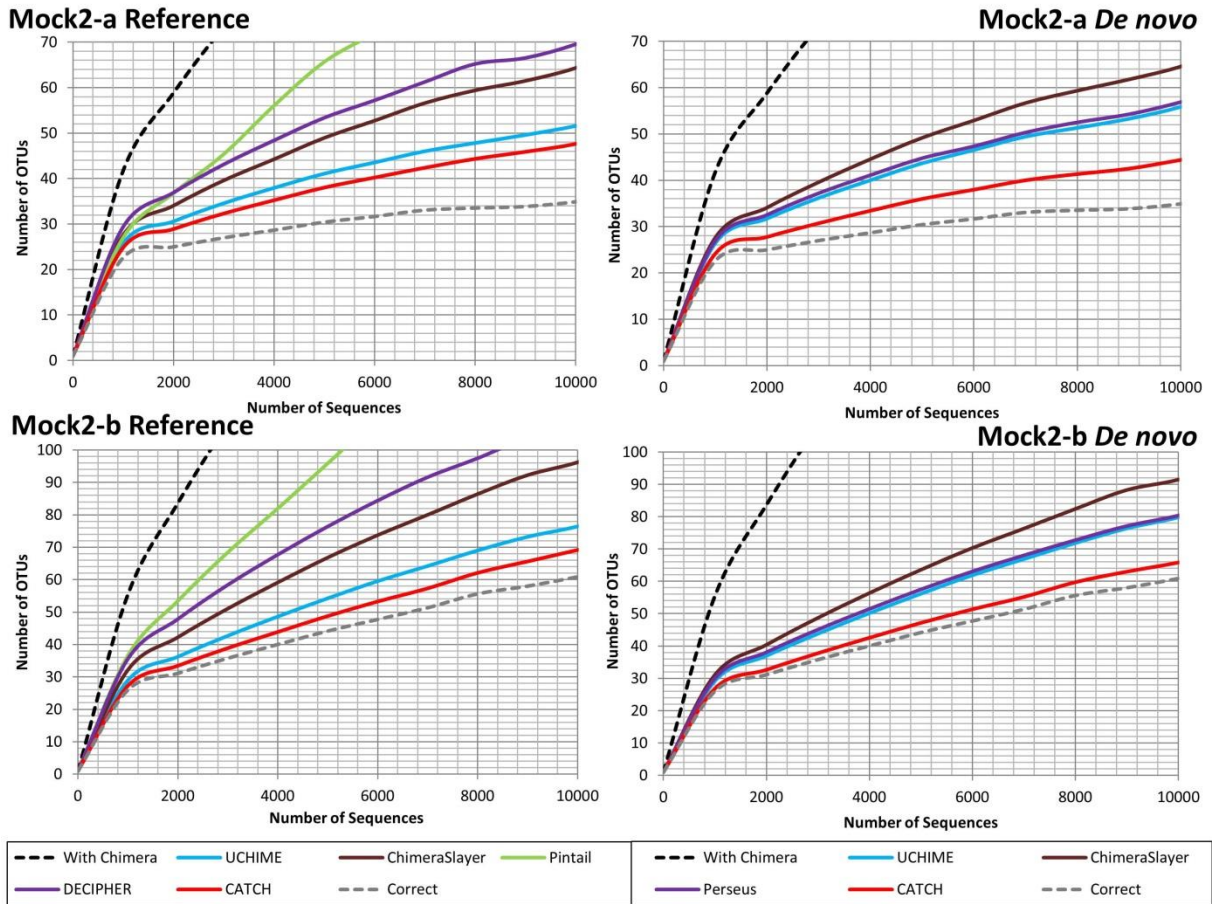

**Figure S7:** Rarefaction curves (up to 10,000 reads) for Mock2 (a and b) including the results i) without any chimera removal ('with chimera'), ii) removing all chimeric sequences ('correct'), and iii) with chimera removal using all tested chimera detection tools (reference-based approaches on the left side and de novo approaches on the right side), averaged over all 69 samples.

**Table S1:** Comparison of the different chimera detection algorithms.

| Tools             | UCHIME                                                                                         | Chimera Slayer                                                                                                       | Pintail                                                                                                                                                  | DECIPHER                                                                                                                                                                                                                                                               | Perseus                                                                                                                                                                                     |
|-------------------|------------------------------------------------------------------------------------------------|----------------------------------------------------------------------------------------------------------------------|----------------------------------------------------------------------------------------------------------------------------------------------------------|------------------------------------------------------------------------------------------------------------------------------------------------------------------------------------------------------------------------------------------------------------------------|---------------------------------------------------------------------------------------------------------------------------------------------------------------------------------------------|
| Available methods | Reference and <i>de novo</i>                                                                   | Reference and <i>de novo</i>                                                                                         | Reference                                                                                                                                                | Reference                                                                                                                                                                                                                                                              | <i>de novo</i>                                                                                                                                                                              |
| Method            | Reads divided into four non-overlapping segments, followed by three way alignment and scoring. | Each end used as seed to find closest parents. Followed by alignment and score calculation where cut-off is applied. | Calculating the differences between the query and the closest reference sequence. Next, expected differences between both (per position) are calculated. | The query sequence is classified to a reference phylogenetic group. A sliding window is used to split the query into different fragments, then depending on their presence inside/outside the assigned group, the query can be classified as chimeric or non-chimeric. | Uses pairwise alignment to identify the possible parents and breakpoints, for the other reads with abundance at least equal to the query. Performs three way alignment followed by scoring. |
| Look up database  | Reference: Gold database.<br><br><i>De novo</i> :<br><br>Equal or more abundant reads          | Reference: Gold database.<br><br><i>De novo</i> :<br><br>Equal or more abundant reads                                | Reference: Gold database.                                                                                                                                | RDP release 10, update 22 (+/- silva and greengenes).                                                                                                                                                                                                                  | Equal or more abundant reads                                                                                                                                                                |



**Table S2:** Overview of the performance of the different regression kernels trained and tested in WEKA according to the procedure described in Material and Methods section. The upper table gives the sensitivity and specificity values obtained on the testing data for the reference based implementation, the lower table gives the overview for the de novo implementation. The selected kernel is highlighted.

| Reference   | Linear Regression | Multi-Layer Perceptron | SVM linear  | SVM PUK     | Decision Stump | Random Forest |
|-------------|-------------------|------------------------|-------------|-------------|----------------|---------------|
| Sensitivity | 0.54              | 0.80                   | 0.80        | 0.85        | 0.59           | 0.83          |
| Specificity | <b>0.90</b>       | <b>0.90</b>            | <b>0.90</b> | <b>0.90</b> | <b>0.75</b>    | <b>0.85</b>   |
| MCC         | 0.41              | 0.66                   | 0.66        | 0.71        | 0.31           | 0.64          |
| Accuracy    | 0.65              | 0.83                   | 0.83        | 0.86        | 0.64           | 0.83          |

| <i>De novo</i> | Linear Regression | Multi-Layer Perceptron | SVM linear  | SVM PUK     | Decision Stump | Random Forest |
|----------------|-------------------|------------------------|-------------|-------------|----------------|---------------|
| Sensitivity    | 0.89              | 0.91                   | 0.91        | 0.92        | 0.80           | 0.89          |
| Specificity    | <b>0.93</b>       | <b>0.93</b>            | <b>0.93</b> | <b>0.93</b> | <b>0.94</b>    | <b>0.93</b>   |
| MCC            | 0.78              | 0.80                   | 0.81        | 0.83        | 0.68           | 0.78          |
| Accuracy       | 0.90              | 0.91                   | 0.92        | 0.93        | 0.84           | 0.90          |

**Table S3:** Illustration of the principle component analysis results, where all components explaining 95% of the variation in both the reference and de novo CATCh implementation are shown, together with the relative influence of each feature. For the reference based CATCh, seven components were needed (C1-C7) and three components (C1-C3) for the de novo. The last row illustrates the proportion of the variation explained by each principal component.

|                       | Reference |       |       |       |       |       |       | De novo               |       |       |       |
|-----------------------|-----------|-------|-------|-------|-------|-------|-------|-----------------------|-------|-------|-------|
|                       | C1        | C2    | C3    | C4    | C5    | C6    | C7    | C1                    | C2    | C3    |       |
| <b>UCHIME</b>         |           |       |       |       |       |       |       | <b>UCHIME</b>         |       |       |       |
| <b>Result</b>         | -0.02     | +0.26 | +0.75 | -0.57 | -0.11 | +0.14 | +0.06 | <b>Result</b>         | +0.42 | +0.17 | -0.33 |
| <b>UCHIME Score</b>   | + .36     | + .42 | + .07 | + .05 | -0.02 | -0.77 | -0.28 | <b>UCHIME Score</b>   | +0.35 | -0.85 | -0.36 |
| <b>ChimeraSlayer</b>  |           |       |       |       |       |       |       | <b>ChimeraSlayer</b>  |       |       |       |
| <b>Results</b>        | + .46     | + .29 | -0.06 | + .20 | -0.30 | + .13 | + .74 | <b>Results</b>        | +0.41 | -0.10 | +0.52 |
| <b>ChimeraSlayer</b>  |           |       |       |       |       |       |       | <b>ChimeraSlayer</b>  |       |       |       |
| <b>Score</b>          | + .51     | + .06 | -0.06 | + .07 | -0.40 | + .47 | -0.57 | <b>Score</b>          | +0.40 | -0.07 | +0.62 |
| <b>Pintail Score</b>  | -0.41     | + .46 | + .04 | + .31 | -0.14 | + .00 | + .05 | <b>Perseus Result</b> | +0.43 | + .35 | -0.24 |
| <b>Pintail Std.</b>   | -0.40     | +0.46 | -0.01 | +0.27 | -0.15 | +0.22 | -0.21 | <b>Perseus Score</b>  | +0.43 | +0.33 | -0.23 |
| <b>Pintail Result</b> | -0.14     | +0.25 | -0.63 | -0.67 | -0.25 | -0.04 | +0.04 |                       |       |       |       |
| <b>DECIPHER</b>       | +0.23     | +0.43 | -0.14 | -0.08 | +0.80 | +0.31 | -0.02 |                       |       |       |       |
| <b>Expressed</b>      |           |       |       |       |       |       |       | <b>Expressed</b>      |       |       |       |
| <b>Variation</b>      | 0.31      | 0.23  | 0.13  | 0.11  | 0.09  | 0.06  | 0.05  | <b>Variation</b>      | 0.81  | 0.08  | 0.06  |
| <b>Cumulative</b>     |           |       |       |       |       |       |       |                       |       |       |       |
| <b>variation</b>      | 0.31      | 0.54  | 0.67  | 0.78  | 0.87  | 0.93  | 0.98  |                       | 0.81  | 0.89  | 0.95  |

**Table S4:** Illustration of several classifiers built using all tools except one (either reference based tools or de novo based tools), using the same training dataset, and tested on Mock2-a. The name of the algorithm mentioned in the first row, is the algorithm which is omitted in creating the corresponding classifier. After adjusting the cut-off to give the same specificity as CATCh, we observed that CATCh (reference and de novo) integrating all available algorithms, provided the highest sensitivity.

|             | Reference |        |               |         |          | <i>de novo</i> |        |               |         |
|-------------|-----------|--------|---------------|---------|----------|----------------|--------|---------------|---------|
|             | Original  | UCHIME | ChimeraSlayer | Pintail | DECIPHER | Original       | UCHIME | ChimeraSlayer | Perseus |
| Sensitivity | 0.82      | 0.76   | 0.80          | 0.69    | 0.38     | 0.85           | 0.82   | 0.82          | 0.79    |
| Specificity | 0.92      | 0.92   | 0.92          | 0.92    | 0.92     | 0.91           | 0.91   | 0.91          | 0.91    |
| MCC         | 0.70      | 0.63   | 0.67          | 0.55    | 0.32     | 0.72           | 0.69   | 0.68          | 0.66    |
| Accuracy    | 0.86      | 0.81   | 0.84          | 0.76    | 0.55     | 0.87           | 0.85   | 0.85          | 0.84    |

**Table S5:** Comparison between different individual tools, the union of all results, and CATCh for A) reference-based algorithms and B) de novo algorithms. The reference-based implementations were tested on 25% of the Titanium dataset (this dataset is not used for training the reference-based CATCh classifier). For the de novo implementations, testing was performed on the F01QS4Z01\_rep2\_v13 subset from Mock2-b.

A) Reference-based

|                    | <b>UCHIME</b> | <b>ChimeraSlayer</b> | <b>Pintail</b> | <b>DECIPHER</b> | <b>Union</b> | <b>CATCh</b> |
|--------------------|---------------|----------------------|----------------|-----------------|--------------|--------------|
| <b>Sensitivity</b> | 0.41          | 0.24                 | 0.00           | 0.80            | 0.87         | 0.85         |
| <b>Specificity</b> | 0.90          | 0.95                 | 1.00           | 0.86            | 0.81         | 0.90         |
| <b>MCC</b>         | 0.32          | 0.23                 | -              | 0.63            | 0.66         | 0.72         |
| <b>Accuracy</b>    | 0.57          | 0.46                 | 0.31           | 0.82            | 0.85         | 0.87         |

B) *De novo*

|                    | <b>UCHIME</b> | <b>ChimeraSlayer</b> | <b>Perseus</b> | <b>Union</b> | <b>CATCh</b> |
|--------------------|---------------|----------------------|----------------|--------------|--------------|
| <b>Sensitivity</b> | 0.79          | 0.71                 | 0.79           | 0.93         | 0.92         |
| <b>Specificity</b> | 0.93          | 0.91                 | 0.94           | 0.87         | 0.93         |
| <b>MCC</b>         | 0.66          | 0.56                 | 0.67           | 0.79         | 0.82         |
| <b>Accuracy</b>    | 0.83          | 0.77                 | 0.83           | 0.91         | 0.92         |

**Table S6:** Illustration of the performance of three trained classifiers: CATCh reference, CATCh de novo and CATCh merged, using the MOCK2-a and MOCK2-b datasets. The results show marginal improvement in sensitivity when using CATCh merged compared CATCh de novo however with the same cost in specificity in MOCK2-b and no improvement in MOCK2-a.

|                    | Mock2-a   |                |        | Mock2-b   |                |        |
|--------------------|-----------|----------------|--------|-----------|----------------|--------|
|                    | CATCh     | CATCh          | CATCh  | CATCh     | CATCh          | CATCh  |
|                    | Reference | <i>De novo</i> | merged | Reference | <i>De novo</i> | merged |
| <b>Sensitivity</b> | 0.82      | 0.85           | 0.85   | 0.93      | 0.95           | 0.96   |
| <b>Specificity</b> | 0.92      | 0.91           | 0.91   | 0.92      | 0.91           | 0.90   |
| <b>MCC</b>         | 0.70      | 0.72           | 0.71   | 0.82      | 0.84           | 0.87   |
| <b>Accuracy</b>    | 0.86      | 0.87           | 0.87   | 0.92      | 0.94           | 0.95   |

**Table S7:** Performance of different reference-based tools when dealing with deletions, insertions, indels and mismatches for Simu4 data, and indels and substitutions for Simu2 data.

|              |                | <i>UCHIME</i> | <i>ChimeraSlayer</i> | <i>Pintail</i> | <i>DECIPHER</i> | <i>CATCH</i> |                | <i>UCHIME</i> | <i>ChimeraSlayer</i> | <i>Pintail</i> | <i>DECIPHER</i> | <i>CATCH</i> |
|--------------|----------------|---------------|----------------------|----------------|-----------------|--------------|----------------|---------------|----------------------|----------------|-----------------|--------------|
| <i>Simu4</i> | <i>Del(1%)</i> | 0.94          | 0.89                 | 0.12           | 0.33            | 0.95         | <i>Del(5%)</i> | 0.75          | 0.81                 | 0.04           | 0.16            | 0.90         |
|              | <i>Ind(1%)</i> | 0.94          | 0.89                 | 0.15           | 0.34            | 0.95         | <i>Ind(5%)</i> | 0.74          | 0.80                 | 0.14           | 0.19            | 0.89         |
|              | <i>Ins(1%)</i> | 0.95          | 0.89                 | 0.18           | 0.34            | 0.95         | <i>Ins(5%)</i> | 0.85          | 0.79                 | 0.33           | 0.18            | 0.91         |
|              | <i>Mis(1%)</i> | 0.94          | 0.86                 | 0.13           | 0.32            | 0.95         | <i>Mis(5%)</i> | 0.85          | 0.67                 | 0.06           | 0.25            | 0.86         |
| <i>Simu2</i> | <i>Ind(1%)</i> | 0.63          | 0.50                 | 0.21           | 0.42            | 0.84         | <i>Ind(5%)</i> | 0.36          | 0.26                 | 0.26           | 0.16            | 0.67         |
|              | <i>Sub(1%)</i> | 0.66          | 0.39                 | 0.20           | 0.48            | 0.82         | <i>Sub(5%)</i> | 0.47          | 0.10                 | 0.20           | 0.30            | 0.68         |

**Table S8:** Sensitivity, specificity, Mathew correlation coefficient (MCC) and accuracy values of all tested chimera prediction tools . The first three datasets are tested with both reference and de novo based tools. The second part of the table contains the datasets either analysed using reference or de novo tools. The last three rows give respectively the average sensitivity and specificity, and the average increase or decrease in sensitivity / specificity when compared with CATCh.

| Evaluation  | Datasets | Reference tools |               |             |             |             | De novo tools |               |             |             |             |
|-------------|----------|-----------------|---------------|-------------|-------------|-------------|---------------|---------------|-------------|-------------|-------------|
|             |          | UCHIME          | ChimeraSlayer | Pintail     | DECIPHER    | CATCh       | UCHIME        | ChimeraSlayer | Perseus     | CATCh       |             |
| Sensitivity | Mock2-A  | 0.79            | 0.66          | 0.58        | 0.61        | 0.82        | Mock2-A       | 0.74          | 0.66        | 0.76        | 0.85        |
| Specificity |          | 0.94            | 0.95          | 0.42        | 0.93        | 0.92        |               | 0.94          | 0.94        | 0.92        | 0.91        |
| MCC         |          | 0.68            | 0.56          | -0.01       | 0.49        | <b>0.7</b>  |               | 0.63          | 0.55        | 0.62        | <b>0.72</b> |
| Accuracy    |          | 0.84            | 0.76          | 0.52        | 0.72        | <b>0.86</b> |               | 0.81          | 0.76        | 0.81        | <b>0.87</b> |
| Sensitivity | Mock2-B  | 0.90            | 0.77          | 0.58        | 0.70        | 0.93        | Mock2-B       | 0.87          | 0.80        | 0.87        | 0.95        |
| Specificity |          | 0.94            | 0.96          | 0.46        | 0.93        | 0.92        |               | 0.94          | 0.94        | 0.93        | 0.91        |
| MCC         |          | 0.79            | 0.66          | 0.04        | 0.56        | <b>0.82</b> |               | 0.76          | 0.67        | 0.75        | <b>0.84</b> |
| Accuracy    |          | 0.91            | 0.82          | 0.54        | 0.76        | <b>0.92</b> |               | 0.89          | 0.83        | 0.89        | <b>0.94</b> |
| Sensitivity | Mock3    | 0.75            | 0.63          | 0.06        | 0.61        | 0.81        | Mock3         | 0.64          | 0.65        | 0.73        | 0.81        |
| Specificity |          | 0.95            | 0.99          | 1.00        | 0.98        | 0.94        |               | 0.98          | 0.97        | 0.98        | 0.96        |
| MCC         |          | 0.65            | 0.63          | NA          | 0.6         | <b>0.69</b> |               | 0.63          | 0.62        | 0.69        | <b>0.74</b> |
| Accuracy    |          | 0.82            | 0.78          | 0.5         | 0.78        | <b>0.84</b> |               | 0.8           | 0.79        | 0.84        | <b>0.87</b> |
| Sensitivity | Simu1    | 0.56            | 0.51          | 0.15        | 0.45        | 0.70        | Mock1         | 0.92          | 0.71        | 0.94        | 0.97        |
| Specificity |          | 1.00            | 1.00          | 0.88        | 1.00        | 0.96        |               | 1.00          | 1.00        | 1.00        | 1.00        |
| MCC         |          | 0.64            | 0.6           | 0.04        | 0.55        | <b>0.69</b> |               | 0.7           | 0.42        | 0.76        | 0.87        |
| Accuracy    |          | 0.8             | 0.77          | 0.54        | 0.75        | <b>0.84</b> |               | 0.93          | 0.74        | 0.94        | 0.98        |
| Sensitivity | Simu2    | 0.69            | 0.53          | 0.21        | 0.48        | 0.81        | Mock4         | 0.37          | 0.27        | 0.27        | 0.47        |
| Specificity |          | 1.00            | 0.99          | 0.80        | 0.99        | 0.98        |               | 0.96          | 0.98        | 0.94        | 0.91        |
| MCC         |          | 1               | 0.99          | 0.8         | 0.99        | <b>0.98</b> |               | 0.33          | 0.28        | 0.22        | 0.35        |
| Accuracy    |          | 0.4             | 0.29          | 0.01        | 0.27        | <b>0.51</b> |               | 0.54          | 0.47        | 0.45        | 0.59        |
| Sensitivity | Simu3    | 0.83            | 0.66          | 0.27        | 0.87        | 0.94        | Mock5         | 0.08          | 0.11        | 0.14        | 0.16        |
| Specificity |          | 0.99            | 1.00          | 0.86        | 0.98        | 0.97        |               | 1.00          | 0.95        | 0.99        | 0.98        |
| MCC         |          | 0.86            | 0.76          | 0.15        | 0.88        | <b>0.90</b> |               | 0.24          | 0.08        | 0.27        | 0.26        |
| Accuracy    |          | 0.95            | 0.91          | 0.71        | 0.95        | <b>0.96</b> |               | 0.85          | 0.81        | 0.85        | 0.85        |
| Sensitivity | Simu4    | 0.95            | 0.90          | 0.17        | 0.27        | 0.95        |               |               |             |             |             |
| Specificity |          | 1.00            | 0.99          | 0.86        | 1.00        | 0.97        |               |               |             |             |             |
| MCC         |          | 0.96            | 0.9           | 0.04        | 0.44        | <b>0.91</b> |               |               |             |             |             |
| Accuracy    |          | 0.98            | 0.96          | 0.62        | 0.75        | <b>0.96</b> |               |               |             |             |             |
| Sensitivity | Average  | <b>0.78</b>     | <b>0.67</b>   | <b>0.29</b> | <b>0.57</b> | <b>0.85</b> | Average       | <b>0.60</b>   | <b>0.53</b> | <b>0.62</b> | <b>0.70</b> |
| Specificity |          | <b>0.97</b>     | <b>0.98</b>   | <b>0.75</b> | <b>0.97</b> | <b>0.96</b> |               | <b>0.97</b>   | <b>0.96</b> | <b>0.96</b> | <b>0.95</b> |
| Difference  |          | 7 / -2          | 18 / -2       | 56 / 21     | 28 / -1     | -           |               | 10 / -2       | 17 / -1     | 8 / -1      | -           |
| MCC         |          | 0.71            | 0.63          | 0.05        | 0.54        | 0.75        |               | 0.55          | 0.44        | 0.55        | 0.63        |
| Accuracy    |          | 0.86            | 0.80          | 0.53        | 0.75        | 0.89        |               | 0.80          | 0.73        | 0.80        | 0.85        |
